# Supplementary material for: How Does Prior Knowledge Influence Learning Engagement? The Mediating Roles of Cognitive Load and Help-Seeking
Source: Frontiers journal article supplement (doi:10.3389/fpsyg.2020.591203), 2020-10-29
Supplement: Data_Sheet_1.PDF [file Data_Sheet_1.PDF]

## Results of the alternative model without EHS & mental effort:

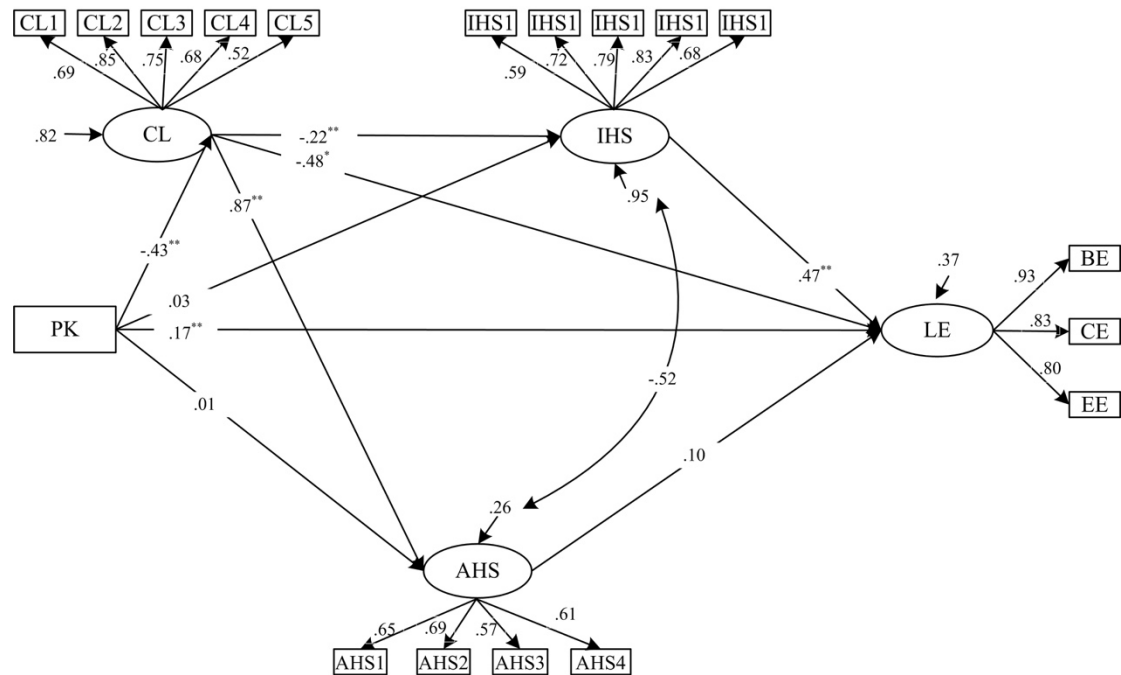

Fig. 2. SEM results of the structural model with standardized coefficients. (PK= prior knowledge, CL = cognitive load, IHS = instrumental help-seeking, AHS = avoidance of help-seeking, LE = learning engagement.)

Note: (1) \* $p < .05$ , \*\* $p < .01$ .

(2) The five manifest variables of CL were items of mental load.

(3) This model does not include EHS (executive help-seeking).

Table 3. Model fit indices.

| Construct          | $\chi^2$ | $df$ | $\chi^2/df$ | CFI  | TLI  | RMSEA [90% CI]    | $p$  |
|--------------------|----------|------|-------------|------|------|-------------------|------|
| CL                 | 41.052   | 19   | 2.41        | .968 | .953 | .058 [.034, .083] | .000 |
| IHS                | 10.050   | 5    | 2.01        | .988 | .977 | .054 [.000, .094] | .000 |
| AHS                | 4.121    | 2    | 2.06        | .985 | .956 | .056 [.000, .133] | .000 |
| LE                 | 116.849  | 51   | 2.29        | .964 | .953 | .061 [.047, .076] | .000 |
| Structural model   | 246.839  | 138  | 1.79        | .955 | .945 | .048 [.038, .058] | .000 |
| Recommended values |          |      | <3          | >.90 | >.90 | <.08              | >.05 |

Table 4. Standardized coefficients for direct and indirect effects of PK on LE through CL, IHS, EHS and AHS

|                         | $\beta$         | $p$          | 95% CI                |
|-------------------------|-----------------|--------------|-----------------------|
| <i>Direct path</i>      |                 |              |                       |
| 1. PK→LE                | 0.170**         | 0.001        | [0.091, 0.248]        |
| 2. PK→IHS               | 0.025           | 0.699        | [-0.080, 0.130]       |
| 4. PK→AHS               | 0.014           | 0.796        | [-0.074, 0.102]       |
| 5. CL→LE                | -0.457**        | 0.008        | [-0.741, -0.173]      |
| <i>Indirect path</i>    |                 |              |                       |
| <b>1. PK→LE</b>         | <b>0.249*</b>   | <b>0.000</b> | <b>[.178, .320]</b>   |
| <b>1a. PK→CL→LE</b>     | <b>0.196*</b>   | <b>0.011</b> | <b>[.069, .324]</b>   |
| 1b. PK→IHS→LE           | 0.012           | 0.700        | [-.038, .061]         |
| 1d. PK→AHS→LE           | 0.000           | 0.963        | [-.005, .005]         |
| <b>1e. PK→CL→IHS→LE</b> | <b>0.045**</b>  | <b>0.016</b> | <b>[.014, .075]</b>   |
| 1g. PK→CL→AHS→LE        | -0.004          | 0.962        | [-.128, .121]         |
| <b>2. PK→CL→IHS</b>     | <b>0.096**</b>  | <b>0.011</b> | <b>[.033, .158]</b>   |
| <b>4. PK→CL→AHS</b>     | <b>-0.372**</b> | <b>0.000</b> | <b>[-.462, -.282]</b> |
| 5. CL→LE                | -0.096          | 0.570        | [-.373, 0.182]        |
| <b>5a. CL→IHS→LE</b>    | <b>-0.104</b>   | <b>0.011</b> | <b>[-.172, -.037]</b> |
| 5c. CL→AHS→LE           | 0.008           | 0.962        | [-.281, .297]         |

Note: \*p < .05, \*\*p < .01
